# Supplementary material for: Permeation dynamics of microemulsions according to the amount of deep eutectic solvent when applied to the stratum corneum
Source: Royal Society of Chemistry journal article supplement (doi:10.1039/d5ra00403a), 2025-01-01
Supplement: d5ra00403a1.pdf [file d5ra00403a1.pdf]

**Supporting Information**

**Permeation dynamics of microemulsions according to the amount of deep eutectic solvent when applied to the stratum corneum**

Shotaro Shinoda,<sup>a</sup> Mina Tanigawa<sup>a</sup> and Mina Sakuragi <sup>\*a</sup>

<sup>a</sup>Faculty of Engineering, Department of Nanoscience, Sojo University, 4-22-1 Ikeda, Nishi-ku, Kumamoto City 860-0082, Japan

\*Corresponding author

Mina Sakuragi, Associate professor

E-mail: [d08b0101@nano.sojo-u.ac.jp](mailto:d08b0101@nano.sojo-u.ac.jp)

Tel: +8196-326-3593

## **Table of Contents**

### **1. Results and Discussion**

1-1. SAXS profiles of the MEs

1-2. SANS profiles of the d-MEs

1-3. DLS measurements of MEs

1-4. WAXS peaks of hydrocarbon chain packing in SCs when MEs were applied

1-5. WAXS peaks area depending on the SC water contents

### **2.**

### **Reference**

## 1. Results and Discussion

### 1-1. SAXS profiles of the MEs

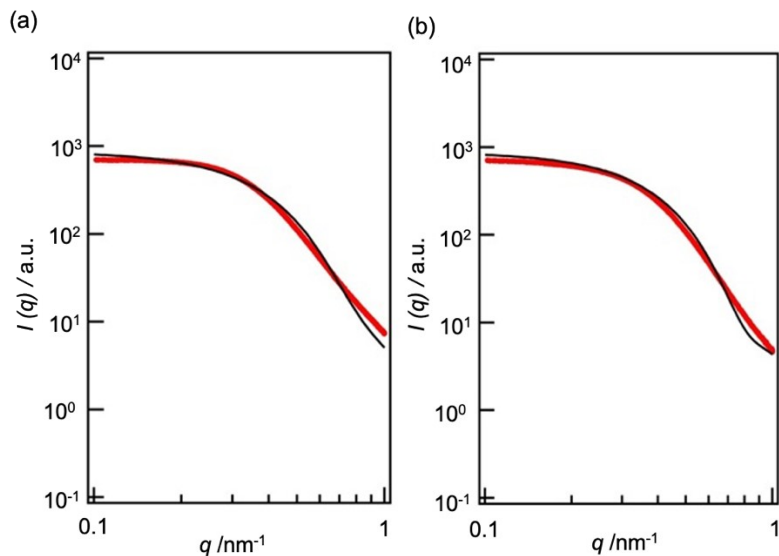

Fig.S1 SAXS profiles of a) 1/6 ME and b) 1/9 ME. Red: experimental data. Black: theoretical curve.

The experimental and theoretical curves exhibited good agreement in the low  $q$  region; however, discrepancies were observed in the high  $q$  region. The increased slope was attributed to the surfactant hydrocarbon chains behaving as Gaussian chains<sup>1,2</sup>. In this study, only the size and shape of the MEs were evaluated.

### 1-2. SANS profiles of the d-MEs

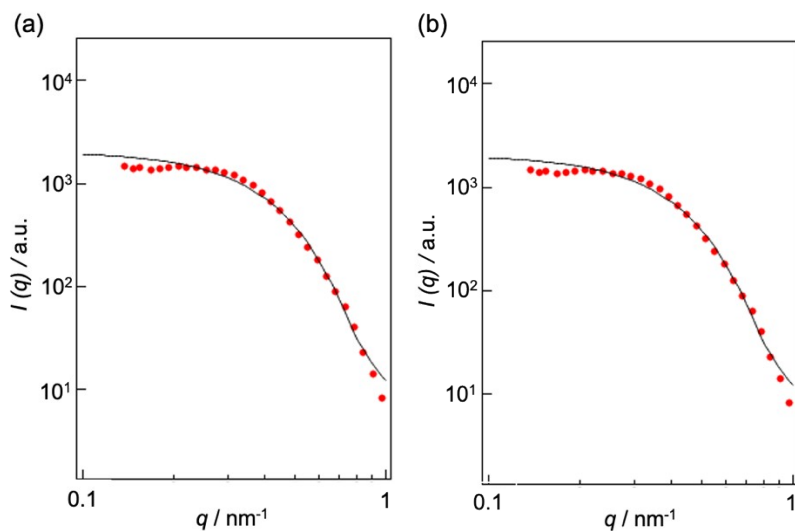

Fig. S2 SANS profiles of (a) 1/6 d-ME and (b) 1/9 d-ME (red: experimental data, black: theoretical curve).

The internal water phase of the MEs was replaced with D<sub>2</sub>O to obtain d-MEs. The internal phases of 1/6 d-ME and 1/9 d-ME had radii of 4.3 and 4.0 nm, respectively.

### 1-3. Dynamic light scattering measurements of MEs

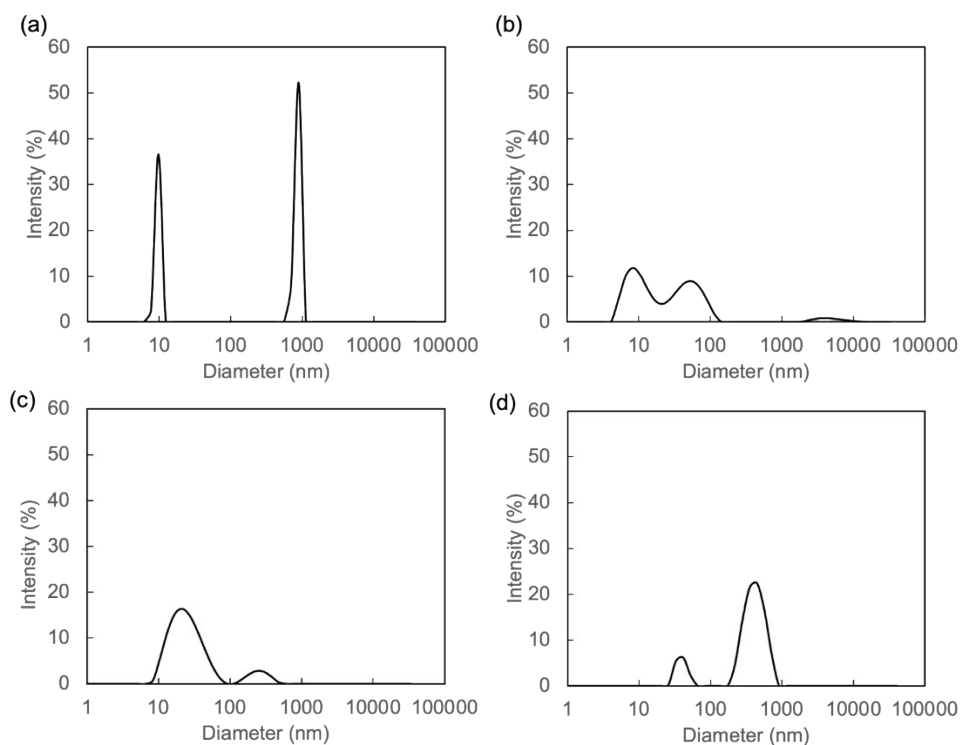

Fig. S3 Size distribution results for (a) 1/4 ME, (b) 1/6 ME, (c) 1/9 ME, and (d) 0/1 MEs obtained by DLS measurements at room temperature.

Table S1 Particle size distributions of MEs.

| Sample name | Less than 100 nm (%) | More than 100 nm (%) |
|-------------|----------------------|----------------------|
| 1/4 ME      | 39.2                 | 60.8                 |
| 1/6 ME      | 94.4                 | 5.6                  |
| 1/9 ME      | 89.5                 | 10.5                 |
| 0/1 ME      | 14.1                 | 85.9                 |

1/6 ME and 1/9 ME had fewer aggregates whereas 1/4 ME and 0/1ME exhibited some aggregation.

#### 1.4. WAXS peaks of hydrocarbon chain packing in SCs when MEs were applied

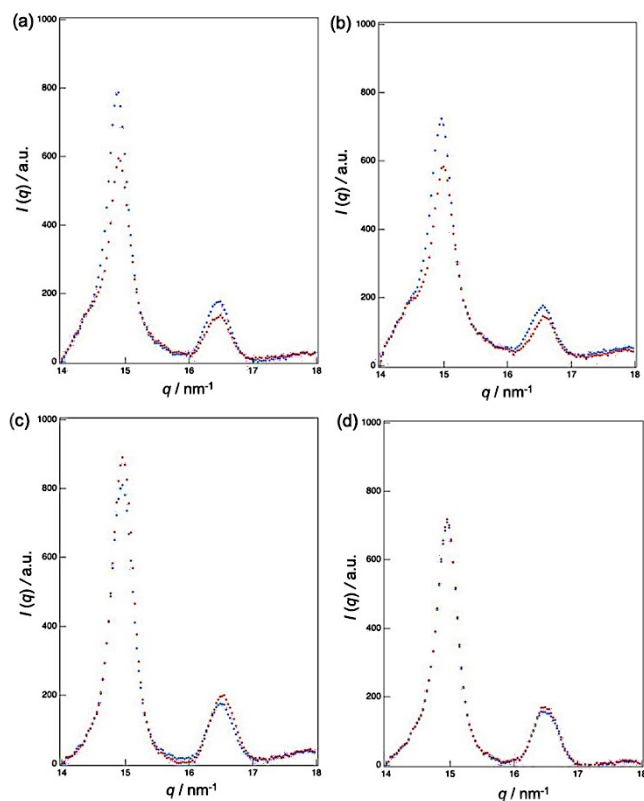

Fig.S4 WAXS profiles of SCs at 1 min (blue) and 180 min (red) after (a) 1/6 ME was applied to dry SC, (b) 1/9 ME was applied to dry SC, (c) 1/6 ME was applied to hydrated SC, and (d) 1/9 ME was applied to hydrated SC.

#### 1-5. WAXS peaks area depending on the SC water contents

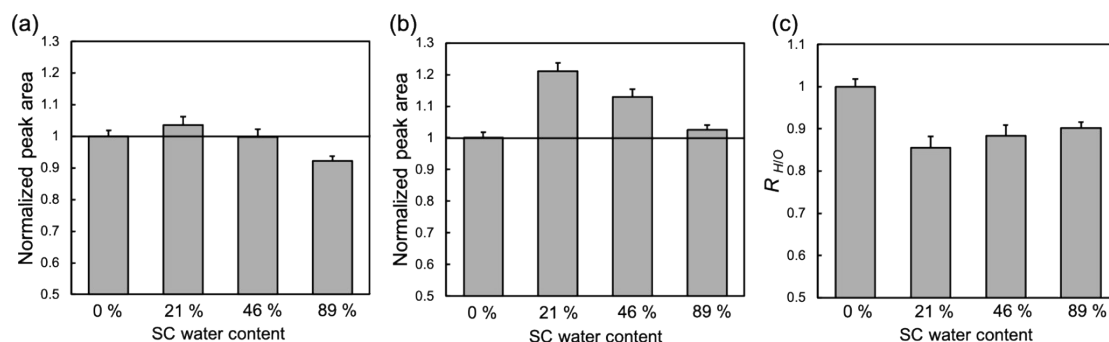

Fig. S5 Peak area ratios of (a) the 0.41 nm and (b) 0.37 nm peaks and (C) normalized  $R_{H/O}$  values at each water content of the SC relative to those at 0% water content.

## **2. References**

- 1 M. Sakuragi, S. Tsutsumi and K. Kusakabe, *Langmuir*, 2018, 34, 12635–12641.
- 2 J. S. Pedersen and M. C. Gerstenberg, *Macromolecules*, 1996, 29, 1363–1365.
